# Supplementary material
Source: Springer Nature journal article supplement (https://www.springermedizin.de/resource/supplementary/12874_2009_383_MOESM1_ESM.PDF/9434358)
Supplement: MOESM1 [file 9434358]

Additional file 1 Infectious disease journals selected initially

| Language of key word for journal selection<br>E; English<br>NE; non-English | Journal title                                                                                               | Language used* | Publishing country | Reason for not being listed as the infectious disease journals selected finally (except for gray labeled journals) |
|-----------------------------------------------------------------------------|-------------------------------------------------------------------------------------------------------------|----------------|--------------------|--------------------------------------------------------------------------------------------------------------------|
| E                                                                           | Advances in pediatric infectious diseases                                                                   | English        | US                 | Inactive in January 2008                                                                                           |
| E                                                                           | African journal of AIDS research                                                                            | English        | Tanzania           | Not registered in the the PubMed                                                                                   |
| E                                                                           | Aging: Immunology and infectious disease                                                                    | English        | US                 | Inactive in January 2008                                                                                           |
| E                                                                           | AIDS†                                                                                                       | English        | UK                 |                                                                                                                    |
| E                                                                           | AIDS action                                                                                                 | English        | UK                 | Inactive in January 2008                                                                                           |
| E                                                                           | AIDS alert                                                                                                  | English        | US                 | Not registered in the SCI category ‡                                                                               |
| E                                                                           | AIDS analysis africa                                                                                        | English        | South Africa       | Inactive in January 2008                                                                                           |
| E                                                                           | AIDS and behavior                                                                                           | English        | US                 | Not registered in the SCI category ‡                                                                               |
| E                                                                           | AIDS and public policy journal                                                                              | English        | US                 | Not registered in the SCI category ‡                                                                               |
| E                                                                           | AIDS care - Psychological and socio-medical aspects of AIDS/HIV                                             | English        | UK                 | Not registered in the SCI category ‡                                                                               |
| E                                                                           | AIDS clinical care                                                                                          | English        | US                 | Not registered in the SCI category ‡                                                                               |
| E                                                                           | AIDS clinical review                                                                                        | English        | US                 | Inactive in January 2008                                                                                           |
| E                                                                           | AIDS education and prevention                                                                               | English        | US                 | Not registered in the SCI category ‡                                                                               |
| E                                                                           | AIDS health promotion exchange / World Health Organization, Global Programme on AIDS, Health Promotion Unit | English        | Switzerland        | Inactive in January 2008                                                                                           |
| E                                                                           | AIDS patient care                                                                                           | English        | US                 | Inactive in January 2008                                                                                           |

|   |                                                                      |         |             |                                      |
|---|----------------------------------------------------------------------|---------|-------------|--------------------------------------|
| E | AIDS patient care and STDs                                           | English | US          |                                      |
| E | AIDS policy & law                                                    | English | US          | Not registered in the SCI category ‡ |
| E | AIDS reader                                                          | English | US          |                                      |
| E | AIDS research                                                        | English | US          | Inactive in January 2008             |
| E | AIDS research and human retroviruses                                 | English | US          |                                      |
| E | AIDS research and therapy                                            | English | UK          | Not registered in the SCI category ‡ |
| E | AIDS reviews                                                         | English | Spain       |                                      |
| E | AIDS treatment news                                                  | English | US          | Not registered in the SCI category ‡ |
| E | AIDS weekly                                                          | English | US          | Not registered in the SCI category ‡ |
| E | AIDS weekly plus                                                     | English | US          | Not registered in the SCI category ‡ |
| E | AIDS, Supplement                                                     | English | UK          | Not registered in the SCI category ‡ |
| E | AIDS/STD health promotion exchange                                   | English | Netherlands | Not registered in the SCI category ‡ |
| E | Aidscriptions                                                        | English | US          | Inactive in January 2008             |
| E | AIDS-Forschung : AIFO = Acquired immune deficiency syndrome research | German  | Germany     | Not registered in the SCI category ‡ |
| E | AIDSlink : Eastern, Central & Southern Africa                        | English | Tanzania    | Not registered in the SCI category ‡ |
| E | American journal of infection control                                | English | US          |                                      |
| E | American journal of tropical medicine and hygiene                    | English | US          |                                      |
| E | Annals of clinical microbiology and antimicrobials                   | English | UK          |                                      |
| E | Annals of tropical medicine and parasitology                         | English | UK          |                                      |
| E | Antibiotics and chemotherapy                                         | English | Switzerland | Inactive in January 2008             |

|   |                                                                                                                                      |         |             |                                      |
|---|--------------------------------------------------------------------------------------------------------------------------------------|---------|-------------|--------------------------------------|
| E | Antibiotiki i meditsinskaia biotekhnologiia = Antibiotics and Medical Biotechnology / Ministerstvo meditsinskoi promyshlennosti SSSR | Russian | Russia      | Inactive in January 2008             |
| E | Antimicrobial agents and chemotherapy                                                                                                | English | US          |                                      |
| E | Antimicrobial agents annual                                                                                                          | English | Netherlands | Inactive in January 2008             |
| E | Antimicrobics and infectious diseases newsletter                                                                                     | English | Netherlands | Inactive in January 2008             |
| E | Anti-infective agents in medicinal chemistry                                                                                         | English | Netherlands | Not registered in the PubMed         |
| E | Antiinfective drugs and chemotherapy                                                                                                 | English | Germany     | Inactive in January 2008             |
| E | Antiviral chemistry and chemotherapy                                                                                                 | English | UK          |                                      |
| E | Antiviral chemistry and chemotherapy, Supplement                                                                                     | English | UK          | Inactive in January 2008             |
| E | Antiviral research                                                                                                                   | English | Netherlands |                                      |
| E | Antiviral therapy                                                                                                                    | English | UK          |                                      |
| E | Archives of AIDS research                                                                                                            | English | US          | Not registered in the SCI category ‡ |
| E | Archives of STD/HIV research                                                                                                         | English | US          | Inactive in January 2008             |
| E | Bailliere's clinical infectious diseases                                                                                             | English | UK          | Inactive in January 2008             |
| E | BETA bulletin of experimental treatments for AIDS:A publication of the San Francisco AIDS Foundation                                 | English | US          | Not registered in the SCI category ‡ |
| E | Biologicals:Journal of the International Association of Biological Standardization UK                                                | English | UK          |                                      |
| E | BMC infectious diseases                                                                                                              | English | UK          |                                      |
| E | British journal of infection control                                                                                                 | English | UK          | Not registered in the PubMed         |

|   |                                                                                                                         |                 |        |                                                                                                                                                              |
|---|-------------------------------------------------------------------------------------------------------------------------|-----------------|--------|--------------------------------------------------------------------------------------------------------------------------------------------------------------|
| E | Bulletin - National Tuberculosis and Respiratory Disease Association                                                    | English         | US     | Inactive in January 2008                                                                                                                                     |
| E | Bulletin of the International Union against Tuberculosis                                                                | English, French | France | Inactive in January 2008                                                                                                                                     |
| E | Bulletin of the International Union Against Tuberculosis and Lung Disease                                               | English         | France | Inactive in January 2008                                                                                                                                     |
| E | Canada communicable disease report = Relevé des maladies transmissibles au Canada                                       | English, French | Canada |                                                                                                                                                              |
| E | Canadian AIDS news                                                                                                      | English, French | Canada | Not registered in the SCI category ‡                                                                                                                         |
| E | Canadian HIV/AIDS policy & law review / Canadian HIV/AIDS Legal Network                                                 | English, French | Canada | Not registered in the SCI category ‡                                                                                                                         |
| E | Canadian HIV-AIDS policy & law newsletter / Canadian HIV-AIDS Legal Network = Réseau juridique canadien VIH-SIDA        | English, French | Canada | Not registered in the SCI category ‡                                                                                                                         |
| E | Canadian journal of infectious diseases (continues as Canadian journal of infectious diseases and medical microbiology) | English, French | Canada | Inactive in January 2008                                                                                                                                     |
| E | Canadian journal of infectious diseases and medical microbiology                                                        | English         | Canada | Not suitable for our study because the journal involves a considerable number of non-research articles, such as clinical vignettes and guidelines, and so on |
| E | CDC AIDS weekly                                                                                                         | English         | US     | Not registered in the SCI category ‡                                                                                                                         |
| E | Chinese journal of antibiotics                                                                                          | Chinese         | China  | Articles are not available in the PubMed§                                                                                                                    |
| E | Chinese journal of infection and chemotherapy                                                                           | Chinese         | China  | Not registered in the PubMed                                                                                                                                 |

|   |                                                              |                 |             |                                           |
|---|--------------------------------------------------------------|-----------------|-------------|-------------------------------------------|
| E | Clinical and vaccine immunology                              | English         | US          |                                           |
| E | Clinical infectious diseases                                 | English         | US          |                                           |
| E | Clinical microbiology and infection                          | English         | France      |                                           |
| E | Clinical microbiology and infection, Supplement              | English         | France      | Not registered in the PubMed              |
| E | Clinical microbiology newsletter                             | English         | US          | Articles are not available in the PubMed§ |
| E | Clinical microbiology reviews                                | English         | US          |                                           |
| E | Communicable disease and public health/PHLS                  | English         | UK          | Inactive in January 2008                  |
| E | Communicable disease report. CDR review                      | English         | UK          | Inactive in January 2008                  |
| E | Communicable disease report. CDR weekly                      | English         | UK          | Inactive in January 2008                  |
| E | Communicable diseases intelligence                           | English         | Australia   |                                           |
| E | Comparative immunology, microbiology and infectious diseases | English, French | UK          |                                           |
| E | CPD infection                                                | English         | UK          | Not registered in the PubMed              |
| E | Critical path AIDS project                                   | English         | US          | Not registered in the SCI category ‡      |
| E | Current clinical topics in infectious diseases               | English         | US          | Inactive in January 2008                  |
| E | Current drug targets - infectious disorders                  | English         | Netherlands | Inactive in January 2008                  |
| E | Current HIV research                                         | English         | Netherlands |                                           |
| E | Current HIV/AIDS reports                                     | English         | US          | Not registered in the SCI category ‡      |
| E | Current infectious disease reports                           | English         | US          |                                           |
| E | Current opinion in HIV and AIDS                              | English         | US          | Not registered in the SCI category ‡      |

|   |                                                                                                                |         |         |                                        |
|---|----------------------------------------------------------------------------------------------------------------|---------|---------|----------------------------------------|
| E | Current opinion in infectious diseases                                                                         | English | US      |                                        |
| E | Current topics in medical mycology                                                                             | English | Spain   | Inactive in January 2008               |
| E | Diagnostic microbiology and infectious disease                                                                 | English | US      |                                        |
| E | Emerging infectious diseases                                                                                   | English | US      |                                        |
| E | Enfermedades infecciosas y microbiología clínica                                                               | Spanish | Spain   |                                        |
| E | Epidemiology and infection                                                                                     | English | UK      |                                        |
| E | Euro surveillance : Bulletin européen sur les maladies transmissibles = European communicable disease bulletin | English | Sweden  | Bulletins are excluded from our survey |
| E | European journal of clinical microbiology                                                                      | English | Germany | Inactive in January 2008               |
| E | European journal of clinical microbiology and infectious diseases                                              | English | Germany |                                        |
| E | Expert review of vaccines                                                                                      | English | UK      |                                        |
| E | FEMS immunology and medical microbiology                                                                       | English | UK      |                                        |
| E | Genetic vaccines and therapy                                                                                   | English | UK      |                                        |
| E | GMHC treatment issues : The Gay Men's health crisis newsletter of experimental AIDS therapies                  | English | US      | Not registered in the SCI category ‡   |
| E | Gruzlica i choroby płuc; Tuberculosis et pneumonologia                                                         | Polish  | Poland  | Inactive in January 2008               |
| E | Hindustan antibiotics bulletin                                                                                 | English | India   | Inactive in January 2008               |
| E | HIV and AIDS review                                                                                            | English | Poland  | Not registered in the SCI category ‡   |
| E | HIV clinical trials                                                                                            | English | US      |                                        |

|   |                                                                                                   |                 |         |                                                                                  |
|---|---------------------------------------------------------------------------------------------------|-----------------|---------|----------------------------------------------------------------------------------|
| E | HIV clinician / Delta Region AIDS Education & Training Center                                     | English         | US      | Not registered in the SCI category ‡                                             |
| E | HIV medicine                                                                                      | English         | UK      |                                                                                  |
| E | HIV nursing                                                                                       | English         | UK      | Not registered in the SCI category ‡                                             |
| E | HIV prevention plus! : The newsletter of the Canadian HIV/AIDS Clearinghouse                      | English, French | Canada  | Not registered in the SCI category ‡                                             |
| E | HIV/AIDS policy & law review / Canadian HIV/AIDS legal network.                                   | English, French | Canada  | Not registered in the SCI category ‡                                             |
| E | Hospital infection control                                                                        | English         | US      | Articles published in 1984 or later are not available in the PubMed              |
| E | Human vaccines                                                                                    | English         | US      |                                                                                  |
| E | IAVI report : Newsletter on international AIDS vaccine research.                                  | English         | US      | Not registered in the SCI category ‡                                             |
| E | Immunology and infectious diseases                                                                | English         | UK      | Inactive in January 2008                                                         |
| E | Indian journal of leprosy                                                                         | English         | India   |                                                                                  |
| E | Indian journal of medical microbiology                                                            | English         | India   |                                                                                  |
| E | Indian journal of medical research - Section A infectious diseases                                | English         | India   | Inactive in January 2008                                                         |
| E | Indian journal of medical research - Section B biomedical research other than infectious diseases | English         | India   | Not suitable for our study because the journal targets non-communicable diseases |
| E | Indian journal of tuberculosis                                                                    | English         | India   | Articles are registered in the PubMed in 2007 or later                           |
| E | Infection                                                                                         | English German  | Germany |                                                                                  |

|   |                                                           |                 |                      |                                                                                                                                 |
|---|-----------------------------------------------------------|-----------------|----------------------|---------------------------------------------------------------------------------------------------------------------------------|
| E | Infection and immunity                                    | English         | US                   |                                                                                                                                 |
| E | Infection control                                         | English         | US                   | Inactive in January 2008                                                                                                        |
| E | Infection control and hospital epidemiology               | English         | US                   |                                                                                                                                 |
| E | Infection control Canada                                  | English, French | Canada               | Inactive in January 2008                                                                                                        |
| E | Infection, genetics and evolution                         | English         | Netherlands          | Not suitable for our study because the journal focuses on basic research as the genetics of hosts and microorganisms, and so on |
| E | Infection, Supplement                                     | English German  | Germany              | Not registered in the PubMed                                                                                                    |
| E | Infections in medicine                                    | English         | US                   | Only one article published in 1993 is available in the PubMed                                                                   |
| E | Infections in surgery                                     | English         | US                   | Inactive in January 2008                                                                                                        |
| E | Infectious agents and disease                             | English         | US                   | Inactive in January 2008                                                                                                        |
| E | Infectious disease clinics of North America               | English         | US                   |                                                                                                                                 |
| E | Infectious diseases in clinical practice                  | English         | US                   | Not registered in the PubMed                                                                                                    |
| E | Infectious diseases in obstetrics and gynecology          | English         | Egypt                |                                                                                                                                 |
| E | Infectious disorders - Drug targets                       | English         | United Arab Emirates |                                                                                                                                 |
| E | International antiviral news                              | English         | UK                   | Inactive in January 2008                                                                                                        |
| E | International journal of antimicrobial agents             | English         | Netherlands          |                                                                                                                                 |
| E | International journal of hygiene and environmental health | English         | Germany              |                                                                                                                                 |



|   |                                                                   |                     |             |                              |
|---|-------------------------------------------------------------------|---------------------|-------------|------------------------------|
| E | International journal of infectious diseases                      | English             | Canada      |                              |
| E | International journal of leprosy                                  | English             | US          | Inactive in January 2008     |
| E | International journal of leprosy and other mycobacterial diseases | English             | US          | Inactive in January 2008     |
| E | International journal of medical microbiology                     | English             | Germany     |                              |
| E | International journal of medical microbiology, Supplement         | English             | Germany     | Not registered in the PubMed |
| E | International journal of STD and AIDS                             | English             | UK          |                              |
| E | International journal of tuberculosis and lung disease            | English             | France      |                              |
| E | Japanese journal of antibiotics                                   | Japanese            | Japan       |                              |
| E | Japanese journal of infectious diseases                           | English             | Japan       |                              |
| E | Japanese journal of leprosy                                       | Japanese<br>English | Japan       |                              |
| E | Japanese journal of medical mycology                              | Japanese<br>English | Japan       |                              |
| E | Journal of antibacterial and antifungal agents, Japan             | Japanese            | Japan       | Inactive in January 2008     |
| E | Journal of antibiotics                                            | English             | Japan       |                              |
| E | Journal of antimicrobial chemotherapy                             | English             | UK          |                              |
| E | Journal of acquired immune deficiency syndromes (1999)            | English             | US          |                              |
| E | Journal of clinical microbiology                                  | English             | US          |                              |
| E | Journal of clinical virology                                      | English             | Netherlands |                              |
| E | Journal of communicable diseases                                  | English             | India       |                              |

|   |                                                                           |                   |                |                                      |
|---|---------------------------------------------------------------------------|-------------------|----------------|--------------------------------------|
| E | Journal of HIV therapy                                                    | English           | UK             | Not registered in the SCI category ‡ |
| E | Journal of HIV/AIDS and social services                                   | English           | US             | Not registered in the SCI category ‡ |
| E | Journal of HIV/AIDS prevention and education for adolescents and children | English           | US             | Not registered in the SCI category ‡ |
| E | Journal of HIV/AIDS prevention in children and youth                      | English           | US             | Not registered in the SCI category ‡ |
| E | Journal of hospital infection                                             | English           | UK             |                                      |
| E | Journal of hygiene epidemiology microbiology and immunology               | Mutiple languages | Czech Republic | Inactive in January 2008             |
| E | Journal of immune based therapies and vaccines                            | English           | UK             |                                      |
| E | Journal of infection                                                      | English           | UK             |                                      |
| E | Journal of infection and chemotherapy                                     | English           | Japan          |                                      |
| E | Journal of infectious disease pharmacotherapy                             | English           | US             | Not registered in the PubMed         |
| E | Journal of infectious diseases                                            | English           | US             |                                      |
| E | Journal of medical and veterinary mycology                                | English           | UK             | Inactive in January 2008             |
| E | Journal of medical and veterinary mycology, Supplement                    | English           | UK             | Inactive in January 2008             |
| E | Journal of medical microbiology                                           | English           | UK             |                                      |
| E | Journal of medical virology                                               | English           | US             |                                      |
| E | Journal of microbiological methods                                        | English           | Netherlands    |                                      |

|   |                                                                                                                                                                           |                 |             |                                                                  |
|---|---------------------------------------------------------------------------------------------------------------------------------------------------------------------------|-----------------|-------------|------------------------------------------------------------------|
| E | Journal of microbiology, immunology and infection                                                                                                                         | Chinese English | China       |                                                                  |
| E | Journal of neuro-AIDS                                                                                                                                                     | English         | US          | Not registered in the SCI category ‡                             |
| E | Journal of the association of nurses in AIDS care                                                                                                                         | English         | US          | Not registered in the SCI category ‡                             |
| E | Journal of the International Association of Physicians in AIDS Care                                                                                                       | English         | US          | Not registered in the SCI category ‡<br>Inactive in January 2008 |
| E | Journal of the International Association of Physicians in AIDS Care:JIAPAC<br>[Journal of the International Association of Physicians in AIDS Care (Chicago, Ill. : 2002] | English         | US          | Not registered in the SCI category ‡                             |
| E | Journal of the physicians association for AIDS care                                                                                                                       | English         | US          | Not registered in the SCI category ‡                             |
| E | Journal of trauma - Injury, infection and critical care                                                                                                                   | English         | US          | Not suitable for our study because the journal focuses on trauma |
| E | Journal of vector borne diseases                                                                                                                                          | English         | India       |                                                                  |
| E | Journal of veterinary medicine series B: Infectious diseases and veterinary public health                                                                                 | English         | Germany     | Inactive in January 2008                                         |
| E | Journal of viral hepatitis                                                                                                                                                | English         | UK          |                                                                  |
| E | Journal of virological Methods                                                                                                                                            | English         | Netherlands |                                                                  |
| E | Kansenshogaku zasshi. The journal of the Japanese Association for Infectious Diseases                                                                                     | Japanese        | Japan       |                                                                  |
| E | Kekkaku                                                                                                                                                                   | Japanese        | Japan       |                                                                  |
| E | Korean journal of medical mycology                                                                                                                                        | Korean          | Korea       | Not registered in the PubMed                                     |
| E | Lancet infectious diseases                                                                                                                                                | English         | US          |                                                                  |

|   |                                                                           |                  |               |                                      |
|---|---------------------------------------------------------------------------|------------------|---------------|--------------------------------------|
| E | Leprosy in India                                                          | English          | India         | Inactive in January 2008             |
| E | Leprosy review                                                            | English          | UK            |                                      |
| E | Malaria journal                                                           | English          | UK            |                                      |
| E | Medecine et maladies infectieuses                                         | French           | France        |                                      |
| E | Medical microbiology and immunology                                       | English          | Germany       |                                      |
| E | Medical microbiology letters                                              | English          | Switzerland   | Inactive in January 2008             |
| E | Medical mycology                                                          | English          | UK            |                                      |
| E | Mediterranean journal of infectious and parasitic diseases                | English          | UK            | Inactive in January 2008             |
| E | Microbes and infection                                                    | English          | France        |                                      |
| E | Microbial drug resistance                                                 | English          | US            |                                      |
| E | Mycoses                                                                   | English          | Germany       |                                      |
| E | Newsline (people with AIDS coalition of New York)                         | English          | US            | Not registered in the SCI category ‡ |
| E | NIAID AIDS agenda / National Institute of Allergy and Infectious Diseases | English          | US            | Not registered in the SCI category ‡ |
| E | Nutrition and metabolic disorders in HIV infection                        | English, Spanish | Spain         | Not registered in the SCI category ‡ |
| E | Pacific AIDS alert bulletin / South Pacific Commission                    | English          | New Caledonia | Not registered in the SCI category ‡ |
| E | Pediatric AIDS and HIV infection                                          | English          | US            | Not registered in the SCI category ‡ |
| E | Pediatric infectious disease                                              | English          | US            | Inactive in January 2008             |
| E | Pediatric infectious disease journal                                      | English          | US            |                                      |

|   |                                                                                |          |              |                                           |
|---|--------------------------------------------------------------------------------|----------|--------------|-------------------------------------------|
| E | Perspectives in medical virology                                               | English  | Netherlands  | Articles are not available in the PubMed§ |
| E | Problems of infectious and parasitic diseases                                  | English  | Bulgaria     | Not registered in the PubMed              |
| E | Problemy HIV i AIDS                                                            | Polish   | Poland       | Not registered in the SCI category ‡      |
| E | Report on pediatric infectious diseases                                        | English  | US           | Inactive in January 2008                  |
| E | Repura. Leprosy                                                                | Japanese | Japan        | Inactive in January 2008                  |
| E | Reviews in medical microbiology                                                | English  | UK           | Not registered in the PubMed              |
| E | Reviews in medical virology                                                    | English  | UK           |                                           |
| E | Reviews of infectious diseases                                                 | English  | US           | Inactive in January 2008                  |
| E | Sabouraudia journal of medical and veterinary mycology                         | English  | UK           | Inactive in January 2008                  |
| E | SAfAIDS news : Southern Africa AIDS Information Dissemination Service bulletin | English  | Zimbabwe     | Not registered in the SCI category ‡      |
| E | Scandinavian journal of infectious diseases                                    | English  | Sweden       |                                           |
| E | Scandinavian journal of infectious diseases, Supplement                        | English  | Sweden       | Inactive in January 2008                  |
| E | Seminars in pediatric infectious diseases                                      | English  | US           | Inactive in January 2008                  |
| E | Seminars in respiratory infections                                             | English  | US           | Inactive in January 2008                  |
| E | Serodiagnosis and immunotherapy in infectious disease                          | English  | US           | Inactive in January 2008                  |
| E | Sexually transmitted diseases                                                  | English  | US           |                                           |
| E | Sexually transmitted infections                                                | English  | UK           |                                           |
| E | Southern African journal of HIV medicine                                       | English  | South Africa | Not registered in the SCI category ‡      |

|   |                                                                                                                                                                                                                                             |                 |             |                                      |
|---|---------------------------------------------------------------------------------------------------------------------------------------------------------------------------------------------------------------------------------------------|-----------------|-------------|--------------------------------------|
| E | Surgical infections                                                                                                                                                                                                                         | English         | US          |                                      |
| E | The Brazilian journal of infectious diseases : An official publication of the Brazilian Society of Infectious Diseases                                                                                                                      | English         | Brazil      |                                      |
| E | The Canadian journal of infection control : The official journal of the Community & Hospital Infection Control Association-Canada = Revue canadienne de prevention des infections / Association pour la prevention des infections a l'hopit | English, French | Canada      | Inactive in January 2008             |
| E | The Hopkins HIV report : A bimonthly newsletter for healthcare providers / Johns Hopkins University AIDS Service                                                                                                                            | English         | US          | Not registered in the SCI category ‡ |
| E | The Journal of antibiotics. Ser. B                                                                                                                                                                                                          | Japanese        | Japan       | Inactive in January 2008             |
| E | Topics in HIV medicine : A publication of the International AIDS Society, USA                                                                                                                                                               | English         | US          | Not registered in the SCI category ‡ |
| E | Transplant infectious disease                                                                                                                                                                                                               | English         | Denmark     |                                      |
| E | Travel medicine and infectious Disease                                                                                                                                                                                                      | English         | Netherlands |                                      |
| E | Tropical medicine & international health                                                                                                                                                                                                    | English         | UK          |                                      |
| E | Tuberculosis                                                                                                                                                                                                                                | English         | UK          |                                      |
| E | Tubercle                                                                                                                                                                                                                                    | English         | UK          | Inactive in January 2008             |
| E | Tubercle and lung disease                                                                                                                                                                                                                   | English         | UK          | Inactive in January 2008             |
| E | Tuberculosis and respiratory diseases                                                                                                                                                                                                       | English         | Korea       | Not registered in the PubMed         |
| E | Update/National Minority AIDS Council                                                                                                                                                                                                       | English         | US          | Not registered in the SCI category ‡ |

|    |                                                                                                                                                      |                             |             |                                           |
|----|------------------------------------------------------------------------------------------------------------------------------------------------------|-----------------------------|-------------|-------------------------------------------|
| E  | Vaccine                                                                                                                                              | English                     | Netherlands |                                           |
| E  | Vaccine research                                                                                                                                     | English                     | US          | Inactive in January 2008                  |
| E  | Vaccines: Children and practice                                                                                                                      | English                     | UK          | Not registered in the PubMed              |
| E  | Vector-borne and zoonotic diseases                                                                                                                   | English                     | US          |                                           |
| E  | Viral hepatitis reviews                                                                                                                              | English                     | UK          | Inactive in January 2008                  |
| E  | Zentralblatt fur Bakteriologie : International journal of medical microbiology                                                                       | English                     | Germany     | Inactive in January 2008                  |
| E  | Zentralblatt fur Bakteriologie, Mikrobiologie, und Hygiene. Series A, Medical microbiology, infectious diseases, virology, parasitology              | English, German             | Germany     | Inactive in January 2008                  |
| E  | Zhonghua jie he he hu xi za zhi=Zhonghua jiehe he huxi zazhi=Chinese journal of tuberculosis and respiratory diseases                                | Chinese                     | China       |                                           |
| E  | Zhonghua shi yan he lin chuang bing du xue za zhi=Zhonghua shiyan he linchuang bingduxue zazhi=Chinese journal of experimental and clinical virology | Chinese                     | China       |                                           |
| E  | Zoonoses and public health                                                                                                                           | English                     | Germany     | The journal has been published since 2007 |
| NE | Acta tuberculosea et pneumologica Belgica                                                                                                            | Multiple languages, English | Belgium     | Inactive in January 2008                  |
| NE | Acta tuberculosea et pneumologica Scandinavica                                                                                                       | English                     | Denmark     | Inactive in January 2008                  |
| NE | Antibiotiques                                                                                                                                        | French                      | France      | Not registered in the PubMed              |
| NE | Beitrage zur Klinik und Erforschung der Tuberkulose und der Lungenkrankheiten                                                                        | German                      | Germany     | Inactive in January 2008                  |

|    |                                                                 |                  |         |                              |
|----|-----------------------------------------------------------------|------------------|---------|------------------------------|
| NE | Enfermedades infecciosas y microbiologia                        | Spanish, English | Spain   | Inactive in January 2008     |
| NE | Enfermedades infecciosas y microbiologia clinica monografias    | Spanish          | Spain   | Not registered in the PubMed |
| NE | Giornale italiano della tubercolosi e delle malattie del torace | Italian          | Italy   | Inactive in January 2008     |
| NE | Immunitat und Infektion                                         | German           | Germany | Inactive in January 2008     |
| NE | Krankenhaushygiene und Infektionsverhutung                      | German           | Germany | Not registered in the PubMed |
| NE | Lotta contro la tubercolosi                                     | Italian          | Italy   | Inactive in January 2008     |
| NE | Praxis der Pneumologie vereinigt mit der Tuberkulosearzt        | German           | Germany | Inactive in January 2008     |
| NE | Problemy tuberkuleza                                            | Russian          | Russia  | Inactive in January 2008     |

|    |                                         |         |        |  |
|----|-----------------------------------------|---------|--------|--|
| NE | Problemy tuberkuleza i boleznei legkikh | Russian | Russia |  |
|----|-----------------------------------------|---------|--------|--|

|    |                                        |        |        |                          |
|----|----------------------------------------|--------|--------|--------------------------|
| NE | Revue de tuberculose et de pneumologie | French | France | Inactive in January 2008 |
|----|----------------------------------------|--------|--------|--------------------------|

|    |                      |         |        |  |
|----|----------------------|---------|--------|--|
| NE | Tuberkuloz ve toraks | Turkish | Turkey |  |
|----|----------------------|---------|--------|--|

|    |             |          |        |                          |
|----|-------------|----------|--------|--------------------------|
| NE | Tuberkuloza | Croatian | Serbia | Inactive in January 2008 |
|----|-------------|----------|--------|--------------------------|

|    |                                                                     |        |         |                          |
|----|---------------------------------------------------------------------|--------|---------|--------------------------|
| NE | ZAC Zeitschrift für Antimikrobielle Antineoplastische Chemotherapie | German | Germany | Inactive in January 2008 |
|----|---------------------------------------------------------------------|--------|---------|--------------------------|

|    |                                                               |        |         |                          |
|----|---------------------------------------------------------------|--------|---------|--------------------------|
| NE | Zeitschrift für Tuberkulose und Erkrankungen der Thoraxorgane | German | Germany | Inactive in January 2008 |
|----|---------------------------------------------------------------|--------|---------|--------------------------|

|    |                                                                                                  |        |         |                          |
|----|--------------------------------------------------------------------------------------------------|--------|---------|--------------------------|
| NE | Zentralblatt für Bakteriologie Parasitenkunde Infektionskrankheiten und Hygiene Zweite Abteilung | German | Germany | Inactive in January 2008 |
|----|--------------------------------------------------------------------------------------------------|--------|---------|--------------------------|



|    |                                                                                                                                                                                                             |                    |         |                             |
|----|-------------------------------------------------------------------------------------------------------------------------------------------------------------------------------------------------------------|--------------------|---------|-----------------------------|
| NE | Zentralblatt für<br>Bakteriologie,<br>Parasitenkunde,<br>Infektionskrankheiten und<br>Hygiene. 1. Abt.<br>Medizinisch-hygienische<br>Bakteriologie,<br>Virusforschung und<br>Parasitologie. Originale       | German             | Germany | Inactive in January<br>2008 |
| NE | Zentralblatt für<br>Bakteriologie,<br>Parasitenkunde,<br>Infektionskrankheiten und<br>Hygiene. Erste Abteilung<br>Originale. Reihe A:<br>Medizinische<br>Mikrobiologie und<br>Parasitologie                 | German,<br>English | Germany | Inactive in January<br>2008 |
| NE | Zentralblatt für<br>Bakteriologie,<br>Parasitenkunde,<br>Infektionskrankheiten und<br>Hygiene. Erste Abteilung<br>Originale. Reihe B:<br>Hygiene, Betriebshygiene,<br>präventive Medizin                    | German             | Germany | Inactive in January<br>2008 |
| NE | Zentralblatt für<br>Bakteriologie,<br>Parasitenkunde,<br>Infektionskrankheiten und<br>Hygiene. Zweite<br>naturwissenschaftliche<br>Abt.: Allgemeine,<br>landwirtschaftliche und<br>technische Mikrobiologie | German,<br>English | Germany | Inactive in January<br>2008 |
| NE | Zentralblatt für<br>Bakteriologie. 1. Abt.<br>Originale. A: Medizinische<br>Mikrobiologie,<br>Infektionskrankheiten und<br>Parasitologie                                                                    | German,<br>English | Germany | Inactive in January<br>2008 |

---

\*Information of the languages were obtained from the PubMed database and the National Library of Medicine (NLM) Catalog of the National Center for Biotechnology Information.

†Gray labeled journals are the selected 100 infectious disease journals.

‡Journals regarding HIV/AIDS were selected according to the 'Infectious Disease Category' of the Science Citation Index Expanded<sup>TM</sup> (the SCI category)

§Journal is registered, but articles in the journal are not available in the PubMed
